# Supplementary material
Source: PubMed Central journal article supplement (PMC4954450)
Supplement: supp_2015-0263_Supplemental_Figures.pdf [file supp_2015-0263_Supplemental_Figures.pdf]

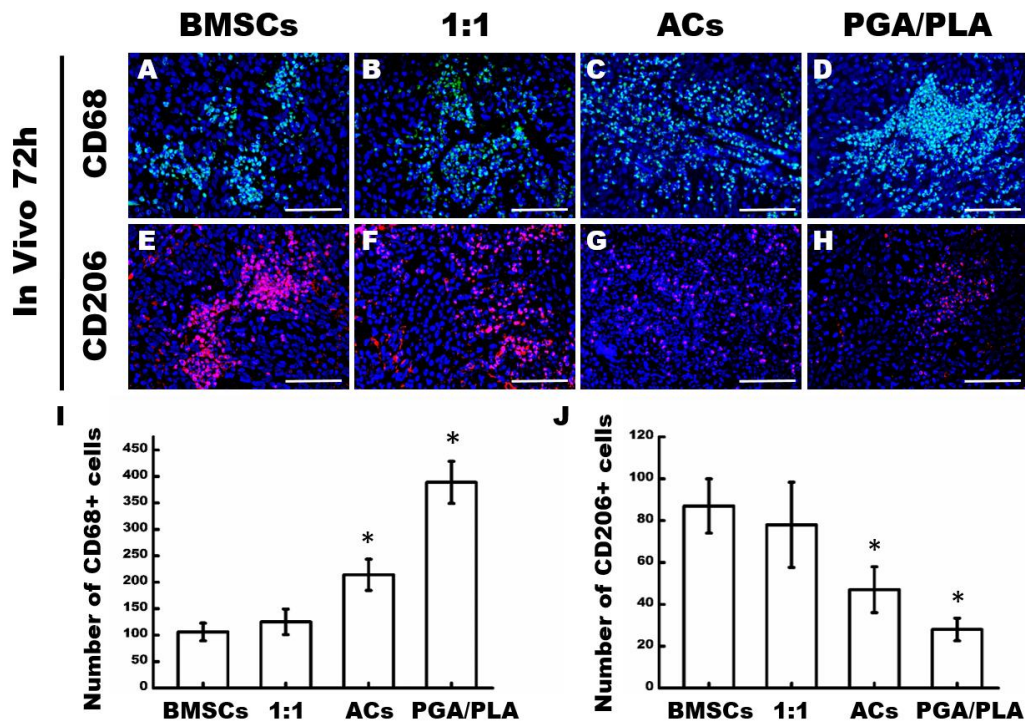

**Figure S2.**

The role of macrophages in the inflammatory response to the engineered cartilage at 72 hrs post-implantation. Immunofluorescent staining of CD68 (green) (A-D) and CD206 (red) (E-H) co-localized with DAPI stained nuclei (blue). Quantitative comparison of CD68 and CD206 positive cells among the groups of BMSCs, 1:1, chondrocytes, and PGA/PLA scaffold (I-J).

Scale bars: 50µm. \*p<0.05 means statistically different from other groups.
